# Supplementary material for: Analysis of Circulating Waves in Tissue Rings derived from Human Induced Pluripotent Stem Cells
Source: PubMed Central journal article supplement (PMC7031392; doi:10.1038/s41598-020-59803-9), 2020-02-19
Supplement: 41598_2020_59803_MOESM4_ESM.pdf [file 41598_2020_59803_MOESM4_ESM.pdf]

## 1 Supplementary Information

2

### 3 Analysis of Circulating Waves in Tissue Rings derived from Human Induced 4 Pluripotent Stem Cells

5

#### 6 Model Equations

7 The model we used refers to classic Priebe & Beuckelmann membrane model<sup>1</sup> and  
8 modified PB model by Bernus et al<sup>2</sup> and Hyperpolarization-activated current model by  
9 Verkerk et al<sup>3</sup>.

10 Equilibrium Potentials:

$$11 \quad E_{\text{Na}} = \frac{RT}{F} \ln \left( \frac{[\text{Na}^+]_e}{[\text{Na}^+]_i} \right) \quad (\text{S-1})$$

$$12 \quad E_{\text{Ca}} = \frac{RT}{2F} \ln \left( \frac{[\text{Ca}^{2+}]_e}{[\text{Ca}^{2+}]_i} \right) \quad (\text{S-2})$$

$$13 \quad E_{\text{to}} = \frac{RT}{F} \ln \left( \frac{0.043 \times [\text{Na}^+]_e + [\text{K}^+]_e}{0.043 \times [\text{Na}^+]_i + [\text{K}^+]_i} \right) \quad (\text{S-3})$$

$$14 \quad E_{\text{K}} = \frac{RT}{F} \ln \left( \frac{[\text{K}^+]_e}{[\text{K}^+]_i} \right) \quad (\text{S-4})$$

15 Na<sup>+</sup> current:

$$16 \quad I_{\text{Na}} = g_{\text{Na}} \times m^3 \times v^2 \times (V_m - E_{\text{Na}}) \quad (\text{S-5})$$

$$17 \quad \alpha_m = \frac{[0.32 \times (V_m + 47.13)]}{1 - \exp[-0.1 \times (V_m + 47.13)]} \quad (\text{S-6})$$

$$18 \quad \beta_m = 0.08 \times \exp \frac{-V_m}{11} \quad (\text{S-7})$$

$$19 \quad \frac{dm}{dt} = (1 - m) \times \alpha_m - m \times \beta_m \quad (\text{S-8})$$

$$20 \quad v_{\infty} = 0.5 \times [1 - \tanh(7.74 + 0.12 \times V_m)] \quad (\text{S-9})$$

$$21 \quad \tau_v = 0.25 + 2.24 \times \frac{1 - \tanh(7.74 + 0.12 \times V_m)}{1 - \tanh[0.07 \times (V_m + 92.4)]} \quad (\text{S-10})$$

$$22 \quad \frac{dv}{dt} = \frac{v_{\infty}(V_m) - v}{\tau_v(V_m)} \quad (\text{S-11})$$

23 Ca<sup>2+</sup> current:

$$24 \quad I_{\text{Ca}} = g_{\text{Ca}} \times d_{\infty} \times f \times f_{\text{Ca}} \times (V_m - E_{\text{Ca}}) \quad (\text{S-12})$$

$$25 \quad d_{\infty} = \frac{\alpha_d}{\alpha_d + \beta_d} \quad (\text{S-13})$$

$$26 \quad \alpha_d = \frac{14.98 \times \exp\{-0.5 \times [(\frac{V_m - 22.36}{16.68})^2]\}}{16.68 \times \sqrt{2\pi}} \quad (S-14)$$

$$27 \quad \beta_d = \frac{0.1471 - 5.3 \times \exp\{-0.5 \times [(\frac{V_m - 6.2}{14.93})^2]\}}{14.93 \times \sqrt{2\pi}} \quad (S-15)$$

$$28 \quad \alpha_f = \frac{0.00687}{1 + \exp\{-\frac{(6.1546 - V_m)}{6.12}\}} \quad (S-16)$$

$$29 \quad \beta_f = \frac{0.069 \times \exp[-0.11 \times (V_m + 9.825)] + 0.011}{1 + \exp[-0.278 \times (V_m + 9.825)]} + 0.000575 \quad (S-17)$$

$$30 \quad \frac{df}{dt} = (1 - f) \times \alpha_f - f \times \beta_f \quad (S-18)$$

$$31 \quad f_{Ca} = \frac{1}{1 + \frac{[Ca^{2+}]_i}{0.0006}} \quad (S-19)$$

32 Transient outward current:

$$33 \quad I_{t_o} = g_{t_o} \times r_{\infty} \times t_o \times (V_m - E_{t_o}) \quad (S-20)$$

$$34 \quad r_{\infty} = \frac{\alpha_r}{\alpha_r + \beta_r} \quad (S-21)$$

$$35 \quad \alpha_r = \frac{0.5266 \times \exp[-0.0166 \times (V_m - 42.2912)]}{1 + \exp[-0.0943 \times (V_m - 42.2912)]} \quad (S-22)$$

$$36 \quad \beta_r = \frac{0.00005186 \times V_m + 0.5149 \times \exp[-0.1344 \times (V_m - 5.0027)]}{1 + \exp[-0.1348 \times (V_m - 0.00005186)]} \quad (S-23)$$

$$37 \quad \alpha_{t_o} = \frac{0.00005612 \times V_m + 0.0721 \times \exp[-0.173 \times (V_m + 34.2531)]}{1 + \exp[-0.1732 \times (V_m + 34.2531)]} \quad (S-24)$$

$$38 \quad \beta_{t_o} = \frac{0.0001215 \times V_m + 0.0767 \times \exp[-1.66 \times 10^{-9} \times (V_m + 34.0235)]}{1 + \exp[-0.1604 \times (V_m + 34.0235)]} \quad (S-25)$$

$$39 \quad \frac{dt_o}{dt} = (1 - t_o) \times \alpha_{t_o} - t_o \times \beta_{t_o} \quad (S-26)$$

$$40 \quad \tau_{t_o}(V_m) = \frac{1}{P \times \alpha_{t_o}(V_m) + P \times \beta_{t_o}(V_m)} \quad (S-27)$$

$$41 \quad t_{o\infty}(V_m) = \frac{\alpha_{t_o} \times (V_m - V_{shift})}{\alpha_{t_o}(V_m - V_{shift}) + \beta_{t_o}(V_m - V_{shift})} \quad (S-28)$$

$$42 \quad \frac{dt_o}{dt} = \frac{t_{o\infty} - t_o}{\tau_{t_o}} \quad (S-29)$$

43 Delayed rectifier K<sup>+</sup> current:

$$44 \quad I_K = g_K \times X^2 \times (V_m - E_K) \quad (S-30)$$

45 
$$X_{\infty} = \frac{0.972}{1 + \exp^{-(2.036 + 0.0834 \times V_m)}} \quad (\text{S-31})$$

46 
$$\tau_X = 380 \times \exp^{-\frac{(V_m + 25.5)^2}{156}} + 166 \times [1 + \tanh(0.558 + 0.0169 \times V_m)] \quad (\text{S-32})$$

47 
$$\frac{dX}{dt} = \frac{X_{\infty} - X}{\tau_X} \quad (\text{S-33})$$

48 Inward rectifier K<sup>+</sup> current:

49 
$$I_{K_1} = g_{K_1} \times K_{1\infty} \times (V_m - E_K) \quad (\text{S-34})$$

50 
$$K_{1\infty} = \frac{\alpha_{K_1}}{\alpha_{K_1} + \beta_{K_1}} \quad (\text{S-35})$$

51 
$$\alpha_{K_1} = \frac{0.1}{1 + \exp^{[0.06 \times (V_m - E_K - 200)]}} \quad (\text{S-36})$$

52 
$$\beta_{K_1} = \frac{3 \times \exp^{0.0002 \times (V_m - E_K + 100)} + \exp^{0.1 \times (V_m - E_K - 10)}}{1 + \exp^{-0.5 \times (V_m - E_K)}} \quad (\text{S-37})$$

53 Background current:

54 
$$I_{Ca,b} = g_{Ca,b} \times (V_m - E_{Ca}) \quad (\text{S-38})$$

55 
$$I_{Na,b} = g_{Na,b} \times (V_m - E_{Na}) \quad (\text{S-39})$$

56 Na<sup>+</sup>-K<sup>+</sup> pump:

57 
$$I_{NaK} = g_{NaK} \times f_{NaK} \times f'_{NaK} \quad (\text{S-40})$$

58 
$$f_{NaK} = \frac{1}{1 + 0.1245 \times \exp^{-0.0037 \times V_m} + 0.0365 \times \sigma \times \exp^{-0.037 \times V_m}} \quad (\text{S-41})$$

59 
$$f'_{NaK} = \frac{1}{1 + \left(\frac{10}{[Na^+]_i}\right)^{1.5}} \times \frac{[K^+]_e}{[K^+]_e + 1.5} \quad (\text{S-42})$$

60 
$$\sigma = 0.1428 \times \left(\exp^{\frac{[Na^+]_e}{67.3}} - 1\right) \quad (\text{S-43})$$

61 Na<sup>+</sup>/Ca<sup>2+</sup> exchanger:

62 
$$I_{NaCa} = g_{NaCa} \times f_{NaCa} \quad (\text{S-44})$$

63 
$$f_{NaCa} = \frac{[Na^+]_i^3 \times [Ca^{2+}]_e \times \exp^{0.013 \times V_m} - [Na^+]_e^3 \times [Ca^{2+}]_i \times \exp^{-0.024 \times V_m}}{(669921 + [Na^+]_e^3) \times (1.38 + [Ca^{2+}]_e) \times (1 + 0.1 \times \exp^{-0.024 \times V_m})} \quad (\text{S-45})$$

64 Hyperpolarization-activated current:

65 
$$I_f = y \times g_f \times (V_m - E_f) \quad (\text{S-46})$$

66 
$$\frac{dy}{dt} = \frac{y_{\infty} - y}{\tau_y} \quad (\text{S-47})$$

67 
$$\tau_y = \frac{1000}{0.36 \times \frac{(V_m + 148.8)}{\exp^{0.066 \times (V_m + 148.8)} - 1} + 0.1 \times \frac{(V_m + 87.3)}{1 - \exp^{-0.21 \times (V_m + 87.3)}}} - 54 \quad (\text{S-48})$$

68 if  $V_m < -80\text{mV}$ :

69 
$$y_{\infty} = \frac{0.99921}{1 + \exp \frac{V_m + 97.134}{8.1752}} + 0.01329 \quad (\text{S-49})$$

70 if  $V_m \geq -80\text{mV}$ :

71 
$$y_{\infty} = \exp \frac{V_m}{12.861} \times 0.0002501 \quad (\text{S-50})$$

72 Concentration of major ions in and out of the cell membrane (units: mM)

| $[\text{Ca}^{2+}]_i$ | $[\text{Ca}^{2+}]_e$ | $[\text{Na}^+]_i$ | $[\text{Na}^+]_e$ | $[\text{K}^+]_i$ | $[\text{K}^+]_e$ |
|----------------------|----------------------|-------------------|-------------------|------------------|------------------|
| 0.0004               | 2                    | 10                | 138               | 140              | 4                |

73 Other parameters:

74  $R = 8.314\text{J/K} ; T = 273 + 37(\text{K}) ; F = 96.5/\text{mmol} ; P = \frac{1}{1.7} ; V_{shift} = -4\text{mV} ; E_f =$

75  $-22\text{mV}$

76

77

78 **References**

- 79 1. Priebe, L. & Beuckelmann, D. J. Simulation study of cellular electric properties  
80 in heart failure. *Circ Res* **82**, 1206–1223 (1998).
- 81 2. Bernus, O., Wilders, R., Zemlin, C. W., Verschelde, H. & Panfilov, A. V. A  
82 computationally efficient electrophysiological model of human ventricular cells.  
83 *Am. J. Physiol. - Hear. Circ. Physiol.* (2002). doi:10.1152/ajpheart.00731.2001
- 84 3. Verkerk, A. O., Van Borren, M. M. G. J. & Wilders, R. Calcium transient and  
85 sodium-calcium exchange current in human versus rabbit sinoatrial node  
86 pacemaker cells. *Sci. World J.* **2013**, (2013).
- 87
